# Supplementary material for: Complete Degradation and Detoxification of Ciprofloxacin by a Micro-/Nanostructured Biogenic Mn Oxide Composite from a Highly Active Mn2+-Oxidizing Pseudomonas Strain
Source: MDPI journal article supplement (doi:10.3390/nano11071660), 2021-06-24
Supplement: s1 [file s1]

## Complete Degradation and Detoxification of Ciprofloxacin by a Micro-/Nanostructured Biogenic Mn Oxide Composite from a Highly Active Mn<sup>2+</sup>-Oxidizing *Pseudomonas* Strain

Li Li, Jin Liu, Jie Zeng, Jiaoqing Li, Yongxuan Liu, Xiaowen Sun, Liangzheng Xu and Lin Li

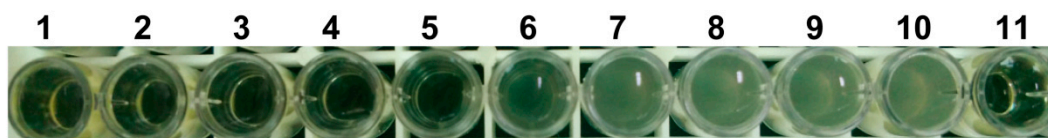

**Figure S1.** Determination of CIP MIC on *Escherichia coli* cells using gradient double diluted CIP solutions. Tube 1–9, CIP at concentrations of 1–0.00390625  $\mu\text{g mL}^{-1}$ ; Tube 10, no CIP; Tube 11, no *E. coli* cells.

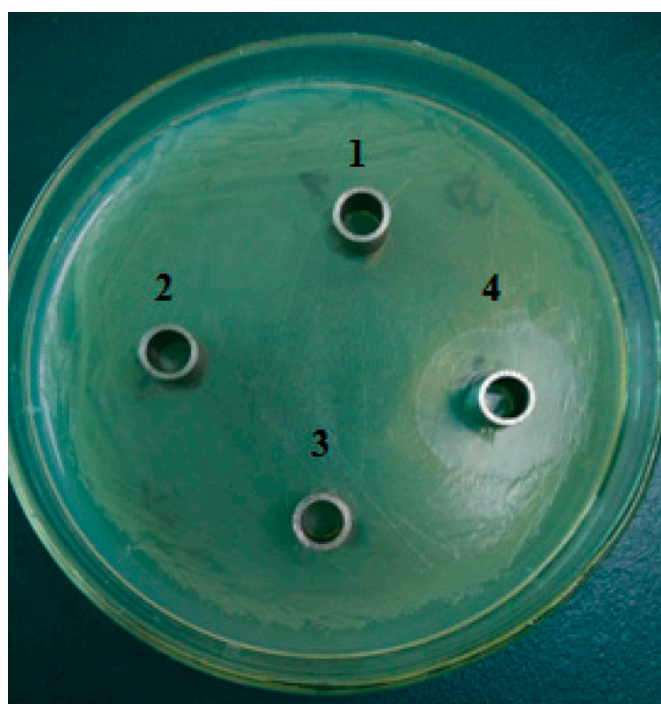

**Figure S2.** Inhibition zone experiment of CIP degradation products on *Escherichia coli* cells. Cup 1, original CIP degradation solution; Cup 2, double-diluted CIP degradation solution; Cup 3, triple-diluted CIP degradation solution; Cup 4, control solution ( $1 \mu\text{g mL}^{-1}$  CIP).
